1 **Effect of tributyltin chloride (TBT-Cl) exposure on expression of *HSP90β1* in the**  
2 **river pufferfish (*Takifugu obscurus*): evidences for its immunologic function**  
3 **involving in exploring process**

4 Xu Dong-po<sup>1,2</sup>, Fang Di-an<sup>2</sup>, Zhao Chang-sheng<sup>2</sup>, Jiang Shu-lun<sup>2</sup>, Hu  
5 Hao-yuan<sup>1\*</sup>

6 1. Key Laboratory of Biotic Environment and Ecological Safety in Anhui  
7 Province, College of Life Sciences, Anhui Normal University, Wuhu, Anhui, 241000,  
8 China.

9 2. Freshwater Fisheries Research Center, Chinese Academy of Fishery Sciences,  
10 Wuxi, Jiangsu, 214081, China

11 \*Corresponding author.

12 E-mail: Prof. Hu, haoyuanhu@126.com

13

14 **Abstract**

15 *HSP90β1* (known as GP96) is a vital endoplasmic reticulum depended chaperonin  
16 among the HSPs family. It plays important roles in regulating the growth,  
17 development, differentiation, and apoptosis of cells. Furthermore, it always processes  
18 and presents antigen of the tumor and keeps balance for the intracellular environment.  
19 In the present study, we explored the effect of tributyltin chloride (TBT-Cl) exposure  
20 on *HSP90β1* expression in river pufferfish, *Takifugu obscurus*. The full length of  
21 *To-HSP90β1* was gained with 2775 bp in length, an ORF obtained with 2412 bp  
22 encoding an 803 aa polypeptide. The phylogenetic tree was constructed and showed  
23 the close relationship to other fish species. The *HSP90β1* mRNA transcript was  
24 expressed in all tissues investigated. After the acute and chronic exposure of TBT-Cl,  
25 the mRNA level of *To-HSP90β1* significantly up-regulated in tissues of liver and gill.  
26 Moreover, the histochemistry study indicated the injury degree of TBT-Cl on liver and  
27 gill. Immunohistochemistry (IHC) staining results implied the cytoplasm  
28 reorganization after TBT-Cl stress and the function of immunoregulation for  
29 *To-HSP90β1*. All the results indicated that *HSP90β1* may involve in the resistance to  
30 the invasion of TBT-Cl for keeping autoimmune homeostasis.

31 **Keywords:** *Takifugu obscurus*; *HSP90β1*; TBT-Cl exposure; immunologic function

32

## 33 **1. Introduction**

34 Heat shock proteins (HSPs) are a series of special proteins which could generate and  
35 be activated in the environment of heat stress and other biological stress (Ritossa,  
36 1962). HSPs are also called stress proteins (SPs) due to taking part in regulating other  
37 stress responses such as oxidative stress, heat, infection, toxicosis and so on (Erlejman  
38 et al., 2014a; Sørensen et al., 2003). It has been proved that HSPs have imperative  
39 roles in inhibiting protein aggregation, helping in folding the nascent proteins, and are  
40 considered to protect cells against oxidative stress, which are protection system to  
41 defend the organisms from harmful stress by preventing their reversible loss of vital  
42 proteins and facilitating their subsequent regeneration (Fu et al., 2011; Jiang et al.,  
43 2012; Parsell and Lindquist, 1993). HSPs derived from cancer cells or cells of viral  
44 infection could cause protective immunity, and their peptide-binding characters for  
45 specific vaccination served a potential approach to resisting the aggression of cancer  
46 and infectious diseases (Udono and Srivastava, 1993; Udono and Srivastava, 1994).  
47 HSPs are a cluster of highly conserved molecular chaperones which were  
48 ubiquitously expressed in tissues. They are segmented into distinct multigenic  
49 families, like HSP110, HSP90, HSP70, HSP60, HSP40 and other small HSPs. Among  
50 them, HSP90 is often found in a constitutive dimer, which participates in controlling  
51 multiple regulatory pathways such as stress defense, hormone signaling, cell cycle  
52 control and apoptosis (Rajeshkumar et al., 2013). In *Crassostrea hongkongensis*,  
53 HSP90 plays a vital role in response to both osmotic stress and bacterial invasion (Fu  
54 et al., 2011). For many fish species, the HSP90 have been connected to cytoprotection

55 and cell survival (Csermely et al., 1998; Smith et al., 2015), performing a protective  
56 and inducible role (Xu et al., 2014; Zhang et al., 2015). HSP90 in the liver was also  
57 found induced by ammonia stress, indicating that this kind of protein hammered at  
58 protecting body from oxidative stress and apoptosis (Cheng et al., 2015). It's worth  
59 noting that *HSP90β1* (GP96), a subtype of HSP90 members, associated with major  
60 histocompatibility complex (MHC) class I molecule, which indicated it might be  
61 involved in immune response (Suto and Srivastava, 1995). The mRNA level of  
62 *HSP90β1* preferentially expressed in hepatocellular carcinoma and significantly  
63 increased in hepatoma cell line. Its expression had a down-regulation when the  
64 oncocytes differentiation was inducted by sodium butyrate. This indicated that  
65 *HSP90β1* had correlations with occurrence and development of cancer and cell  
66 differentiation (Cai et al., 1993; Heike et al., 2000a). Studies had shown that some  
67 stress factors made increases of expression level for GP96, in the meanwhile, its  
68 immunogenicity of GP96 was also aggrandized and rose with the expression level  
69 increasing (Dai et al., 2003). In the process of autoimmunity, the cell surface  
70 expression level of an endoplasmic reticulum (ER)-dependent GP96 initiated systemic  
71 autoimmune diseases in the body (Liu et al., 2003). Totally, *HSP90β1* exert great  
72 effects to raise the body immunity. Its special role in the study of anti-neoplastic  
73 immunity had been a hot topic for clinical immunotherapy (Conrad and Nestle, 2003;  
74 Mansour and Ronald, 2004).

75 Tributyltin chloride (TBT-Cl), is one of the most representative chemical compounds  
76 of Tributyltin (TBT). In view of its fatal toxicity to hydrobios, TBT was severed as a

77 threat to water security (Antizar-Ladislao, 2008; Organization, 2001). TBT residual in  
78 water from various channels had become a noticeable problem, which made TBT  
79 contamination of aquatic ecosystems (Antizar-Ladislao, 2008; Tessier et al., 2007).  
80 TBT induced imposex in mollusks and fishes, which suggested that this toxic  
81 substance exerting a force on aquatic animal gonad function (Matthiessen, 2008;  
82 Mcallister and Kime, 2003; Nakayama et al., 2004; Shimasaki et al., 2003).  
83 Furthermore, TBT was found to be an inducer in the course of accumulation of  
84 adipose and altered fatty acid levels in male and female *Marisa cornuarietis* (Inadera  
85 and Shimomura, 2005; Janer et al., 2007; Meador et al., 2011). In zebrafish, TBT  
86 indeed altered multiple and complex activities of mRNA level in lipid metabolism and  
87 cell damage, which implied that underlying molecular mechanism of TBT on hepatic  
88 steatosis (Zhang et al., 2016).

89 *Takifugu obscurus*, commonly known as river pufferfish, is an anadromous fish and an  
90 economic species, and studies on pufferfish aquaculture and its ecological  
91 environment have been a hot topic in the meanwhile (Kai et al., 2005; Van, 2004;  
92 Yamanoue et al., 2009). The pufferfish are important and scarce sources at the lower  
93 reaches of the Yangtze River and the river mouth area in China. As is mainly used as a  
94 biocide in antifouling agents applied to ships to prevent attachment of mollusks and  
95 hydrophyte (Antizar-Ladislao, 2008), the pulotions of TBT-Cl residuary in Yangtze  
96 River could exert an influence to its development of pufferfish. *T. obscurus* was  
97 always chosen as a model to explore its adaptive and resisting mechanisms when  
98 exposed to different kinds of environmental stress factors (Kato et al., 2005; Kim et al.,

99 2010a). However, the physiological function of the pufferfish under the exposure of  
100 TBT-Cl keeps unclear. It's attractive to us that studying for its mechanism of *T.*  
101 *obscurus* exposed to TBT-Cl may have a profound meaning.

102 In this paper, *HSP90β1* gene in *T. obscurus* from databases of transcriptome  
103 sequencing was characterized by bioinformatic analysis, and the phylogenetic tree  
104 was constructed based on HSP90 sequences of other species. Tissues expressions of  
105 this gene were detected by quantitative real-time PCR (qPCR) method. After exposing  
106 to different concentrations of TBT-Cl in the acute and chronic experiment, the  
107 *HSP90β1* mRNA level was checked through qPCR. The histochemistry and IHC test  
108 were performed to verify the damaging effect of TBT-Cl to the pufferfish. This study  
109 may supply a deeper understanding of the unique function of *HSP90β1* in the course  
110 of fighting with the adverse effect of TBT-Cl and explain the conceivable mechanism  
111 in immunoreaction.

## 112 **2. Materials and methods**

### 113 **2.1 Animals**

114 *T. obscurus* with an average length of  $10 \pm 1.5$  cm and an average weight of  $25.1 \pm$   
115  $2.23$  g were obtained from the aquaculture base in Freshwater Fisheries Research  
116 Center (FFRC, Wuxi, China). The pufferfish were kept in 100-L cylindrical opaque  
117 polypropylene aquaria and supplied with commercial feed twice a day at regular  
118 intervals. After at least 7-day acclimation, robust animals were chosen until 24  
119 h-feeding before the experimental treatments. The water was exposed to air for a

120 week to remove chlorine. During the experiment, the temperature kept at  $26 \pm 2$  °C,  
121 the dissolved oxygen and pH maintained at  $7.93 \pm 0.45$  mg/L and  $7.83 \pm 0.12$ ,  
122 respectively. All the operations to the pufferfish were carried out in strict accordance  
123 with the recommendation in the criterion for the care and use of laboratory animals.

## 124 **2.2. TBT-Cl exposure and sampling**

125 Healthy fish were randomly chosen and divided into four groups. On the basis of 96 h  
126 acute toxicity experiment ( $96 \text{ h-LC}_{50} = 19.62 \mu\text{g/L}$ ), the pufferfish were exposed to  
127 three kind of concentrations of TBT-Cl ( $10\% 96 \text{ h-LC}_{50}$ ,  $20\% 96 \text{ h-LC}_{50}$  and  $50\% 96$   
128  $\text{h-LC}_{50}$ ) and the DMSO solution ( $V(\text{DMSO}): V(\text{water}) = 1\%$ ). Ten individuals were  
129 put into a group randomly. After the exposure, at the time point of 96 h, fish were  
130 collected ( $n = 6$ ) and anesthetized in diluted tricaine methanesulfonate (MS-222,  
131 Sigma, USA) at the concentration of 100 mg/L. The fish were put on the ice and  
132 sampled with blood, liver, gill, heart, muscle, stomach, intestine, kidney, spleen and  
133 brain.

134 For the chronic toxicity experiment, the treatment group ( $900 \text{ ng/L}$  of TBT-Cl) and a  
135 control group (DMSO group) were set. Each group had six repetitions ( $n = 6$ ), 10 fish  
136 were in each repetition. The experimental period was 30 days, and sampling was  
137 performed every 10 days. The fish was collected in each repetition randomly. Blood  
138 was extracted and the brain, liver, gill, stomach, intestine, heart, muscle, kidney and  
139 spleen were sampled.

140 After 30-d exposure experiment, the recovery test was followed. The water in all

141 groups was changed to aerated tap-water. The period was 30 days and fish were  
142 collected every 15 days. Six animals were gained in each group randomly (n = 6).  
143 After normal saline wash, the fish put on ice were rapidly sampled and its blood, brain,  
144 liver, gill, heart, muscle, stomach, intestine, kidney and spleen were sampled. All the  
145 serum and tissues were snap-frozen in liquid nitrogen after labeled and stored at  
146  $-80^{\circ}\text{C}$  for later assay.

### 147 **2.3. Total RNA extraction and cDNA preparing**

148 Total RNA was isolated from the harvested pufferfish tissue using Trizol reagent  
149 (Invitrogen, USA) according to the manufacturer's instruction, then dissolved in  
150 DEPC (diethylpyrocarbonate)-treated water and stored at  $-80^{\circ}\text{C}$ . The cDNA template  
151 was prepared containing 2  $\mu\text{g}$  total RNA by reverse transcription reaction by a  
152 PrimeScript<sup>TM</sup> RT reagent Kit with gDNA Eraser (Perfect Real Time) (TaKaRa, Japan)  
153 following the manufacturer's protocol. The concentration and quality of RNA and  
154 DNA products were measured by spectrophotometry (absorbance at 260 nm) and  
155 agarose gel electrophoresis, respectively.

### 156 **2.4. The full-length cloning and phylogenetic analysis**

157 Target sequences of cDNAs encoding *HSP90 $\beta$ 1* were obtained from the libraries of  
158 transcriptome sequencing (unpublished data). The specific primer for *HSP90 $\beta$ 1* was  
159 designed using Primer Premier 5 (*To-HSP90 $\beta$ 1-S*:  
160 TGGTGGGAGCGGTGGCTTGTCAGTCCTTGT; *To-HSP90 $\beta$ 1-A*:



161 AGAACCACAGTGGAGCTGGA ACTCTCAGAC). The full-length template for cloning  
162 *To-HSP90β1* was verified by PCR amplification. Its product was determined by  
163 agarose gel electrophoresis. The biological sequence obtained was analyzed by  
164 BLAST (<https://blast.ncbi.nlm.nih.gov/Blast.cgi>) in NCBI (Mcginnis and Madden,  
165 2004). The program ClustalW2 was used to perform multiple sequence alignment  
166 (Chenna et al., 2003; Thompson et al., 2002). The phylogenic tree was constructed  
167 with MEGA 6.0 through a neighbor-joining (NJ) algorithm based on the deduced  
168 amino acid sequence of HSP90 for some other species (Kelly et al., 2006; Yu et al.,  
169 2015).

## 170 **2.5. qPCR detection of tissues expression patterns**

171 The cDNA sample (n = 6) collected from blood, liver, stomach, intestine, gill, heart,  
172 muscle, kidney, spleen and brain above were all performed to determine their  
173 expressions by qPCR. The primer of *To-HSP90β1* was designed (RT-*HSP90β1*-F:  
174 CCCTGGAGAAGGACTTTGAGC, RT-*HSP90β1*-R:  
175 GGGGTGTTTGGGGTTGATTT). *β-actin* (RT-*β-actin*-F:  
176 AGAGGGAAATCGTGCGTGAC, RT-*β-actin*-R: CAAGGAAGGATGGCTGGAAG)  
177 in *T. obscurus* (GeneBank accession number: EU871643) was measured as the  
178 internal control to normalize the level of qPCR results. Before beginning the qPCR  
179 program, the specificity and efficiency of primers were tested. The reaction system  
180 was carried out in a total volume of 20 μL, including 10 μL of SYBR *Premix Ex Taq*  
181 II (TaKaRa, Japan), 2 μL of cDNA template (80 ng total RNA), 1.6 μL of both sense

182 and anti-sense primers (10  $\mu$ M), 0.4  $\mu$ L of ROX Reference Dye (50  $\times$ ) and 6  $\mu$ L of  
183 PCR-grade water, which carried out in triplicate. Two-step PCR program was  
184 performed, which containing of 1 cycle of 94  $^{\circ}$ C for 35 s, 40 cycles of 95  $^{\circ}$ C for 10 s,  
185 59  $^{\circ}$ C for 30 s, followed by 1 cycle of 95  $^{\circ}$ C for 15 s, 60  $^{\circ}$ C for 60 s and 95  $^{\circ}$ C for 30 s.  
186 qPCR results were calculated by using ABI StepOnePlus Real-Time PCR software  
187 (Applied Biosystems, USA) with  $2^{-\Delta\Delta C_t}$  methods (Schmittgen and Livak, 2008).

## 188 **2.6. The qPCR detection of *To-HSP90 $\beta$ 1***

189 qPCR was performed to determine the expression level of *HSP90 $\beta$ 1* in the liver  
190 treated with TBT-Cl at timepoint 96 h under the concentration of 0, 10%, 20% and 50%  
191 of 96 h-LC<sub>50</sub> TBT-Cl using the gene-specific primers (see in Section 2.5). It was also  
192 detected in chronic toxicity and recovery test. The reaction process referred to the  
193 operation Section above. The qPCR of each sample carried out in triplicate (n = 3).  
194 Besides, the expression of *To- $\beta$ -actin* was measured and used as the internal control to  
195 normalize the results of qPCR analysis.

## 196 **2.7. Preparation of paraffin section**

197 The fresh gill and liver tissues were fastened with 10% neutral formalin for 24 h. The  
198 dehydration was reached with the different concentrations of ethanol. And, the waxed  
199 tissues were buried in the embedding machine and the dressed block was sliced,  
200 flattened then baked at 65  $^{\circ}$ C.

201 The paraffin section was dewaxed, washed, and stained with cold hematoxylin for 8

202 min. After washed by freshwater, the section was stained with eosin stain for 3 min.  
203 When dehydrated by ethanol and dimethylbenzene, the histological section was sealed  
204 by neutral gum.

## 205 **2.8. The anti-HSP90 $\beta$ 1 antibody preparation**

206 The synthetic polypeptide and monoclonal antibody were enforced commercially by  
207 Abcam (Abcam, England). In short, HSP90 $\beta$  with a synthetic C-terminal peptide  
208 (EDASRMEEVD) combined with keyhole limpet hemocyanin was emulsified with  
209 complete Freund adjuvant for the first immunization and incomplete Freund adjuvant  
210 for the second to fourth immunizations and was injected into a New Zealand rabbit at  
211 one-month interval. Before the fourth immunization, its serums of the rabbit were  
212 sampled. An increase in antibody titers against the peptide was verified by  
213 enzyme-linked immunosorbent assay (ELISA).

## 214 **2.9. Immunohistochemistry**

215 Paraffin sections were used for IHC analyses. Livers and gills at different sampling  
216 stages were taken out and fixed in 0.01 M phosphate-buffered saline (PBS) containing  
217 4% of paraformaldehyde at 4 °C for above 6 h. After PBS washing for three times, the  
218 samples were dehydrated in 30% saccharose-PBS solutions for 4 h at room  
219 temperature and then embedded in organ optimal cutting temperature compound  
220 (Sakure, USA). Standard sections of 8  $\mu$ m in thickness were taken using a microtome  
221 (Leica, Germany). IHC was put into effect according to the modified manual

222 (Multhoff, 2007). Briefly, the sections were washed for three times with 0.01 M PBS  
223 for 15 min each wash. Sections were soaked with 0.01 M citric acid buffer (pH 6.0)  
224 which contained 0.1% of Tween 20 and autoclaved for 5 min. The sections were  
225 blocked in PBS (pH 7.4) and incubated with anti-HSP90 $\beta$  (1:200) overnight at 4 °C.  
226 Then the sections were washed three times with 0.01 M PBS for 10 min each wash.  
227 Subsequently, the tissue sections were incubated with secondary antibody goat  
228 anti-rabbit IgG conjugated with horseradish peroxidase for 30 min, and then rinsed  
229 three times for 5 min each wash with PBS. Immunoreactive signals were observed by  
230 diaminobenzidine (Sigma, Japan) as the substrate. The sections were counterstained  
231 with hematoxylin-eosin (HE). Incubated buffers preimmune rabbit serum and the  
232 blocking solution were also used to treat organ sections as the negative control.

## 233 **2.10. Statistical analysis**

234 IBM SPSS Statistics 19 (Chicago, IL, USA) was used and the significant difference  
235 was shown by student's t-test and one-way ANOVA (one-way analysis of variance) by  
236 the mean of comparing means between samples in the process of data analysis. The P  
237 value set below 0.05 was considered to be statistically significant (signed as a, b, c or  
238 d). The results we got were presented as means  $\pm$  SD (standard deviation).

## 239 **3. Results**

### 240 **3.1. The characterization and phylogenetic analysis**

241 After exploring the transcriptome libraries, a member of *To-HSP90* was determined:

242 *To-HSP90β1* (GeneBank accession number: MG597234). The full length was  
243 obtained as 2775 bp in length, with the ORF (open reading frame) of 2412 bp.  
244 Besides, it contained a 112 bp of 5'-UTR (untranslated region) and a 251 bp of  
245 3'-UTR (Fig. 1). *ToHSP90β1* ORF sequence encoded an 803 aa polypeptide, the  
246 molecular mass of 92.36 kDa and the pI of 4.72. After the InterPro sequence search,  
247 in *HSP90β1*, four homologous superfamilies were found: two Histidine  
248 kinase/HSP90-like ATPase superfamilies (position 77-299 aa and 338-375 aa), a  
249 Ribosomal protein S5 domain 2-type fold (position 345-600 aa) and an HSP90,  
250 C-terminal domain (position 624-749 aa). Several feasible functional domains were  
251 detected in *To-HSP90β1* using Motif Scan tool  
252 ([https://myhits.isb-sib.ch/cgi-bin/motif\\_scan](https://myhits.isb-sib.ch/cgi-bin/motif_scan)) (Liu et al., 2002; Periannan et al., 2012).  
253 The *To-HSP90β1* sequence consisted of an Amidation site, four Asn\_glycosylation  
254 sites, three cAMP\_phospho\_site, seventeen CK2\_phospho\_site, seven MYRISTYL  
255 sites, sixteen PKC\_phospho\_site, a RGD site, three TYR\_phospho\_site, an ER\_Target  
256 domain, a Heat shock hsp90 proteins family signature domain, an aspartic acid-rich  
257 region profile, a ELM2 domain profile, a Glutamic acid-rich region profile, a  
258 Histidine kinase domain profile, a Bipartite nuclear localization signal profile, a  
259 Protein prenyltransferases alpha subunit repeat profile, a Histidine kinase-, DNA  
260 gyrase B-, and HSP90-like ATPase and an Octapeptide repeat. The sequence also  
261 contained an HSP90 domain and a chaperone protein htpG signature (marked in Fig.  
262 1), which showed that this protein really played specific roles due to its motifs.  
263 BLAST analysis revealed that *To-HSP90β1* shared high similarity with other HSP90s,

264 including those from *Takifugu rubripes* HSP90 $\beta$ 1 (99%), *Notothenia coriiceps*  
265 HSP90 $\beta$ 1 (86%), *Lates calcarifer* HSP90 $\beta$ 1 (86%), *Larimichthys crocea* HSP90 $\beta$ 1  
266 (87%), *Monopterus albus* HSP90 $\beta$ 1 (86%), *Oreochromis niloticus* HSP90 $\beta$ 1 (85%),  
267 *Paralichthys olivaceus* HSP90 $\beta$ 1 (85%), *Oryzias latipes* HSP90 $\beta$ 1 (84%), *Salmo*  
268 *salar* HSP90 $\beta$ 1 (84%), *Oncorhynchus mykiss* HSP90 $\beta$ 1 (83%), *Danio rerio* HSP90 $\beta$ 1  
269 (82%), *Rattus norvegicus* HSP90 $\beta$ 1 (76%) and *Scylla paramamosain* HSP90 (72%).  
270 The HSP90 $\beta$ 1 and members of HSP90 for other species were used to construct the  
271 phylogenetic tree by Clustal 1.81 and MEGA 6.0. The sequence *To-HSP90 $\beta$ 1* was  
272 most closed the species of *T. rubripes* HSP90 $\beta$ 1, which indicated a significant  
273 correlation of genetic relationship for these two fish in evolution. The NJ  
274 phylogenetic tree contained four distinct branches, where *T. obscurus* clustered with  
275 fish species especially for anadromous fish, with mammals and birds formed a  
276 different cluster. In addition, the conservational and phylogenic clustering of  
277 eukaryote HSP90 sequence is consistent with eukaryotic classification (Fig. 2).

### 278 **3.2. *To-HSP90 $\beta$ 1* expression pattern in tissues and after TBT-Cl** 279 **exposure**

280 The pattern of HSP90 $\beta$ 1 in river pufferfish was ubiquitously expressed in all the  
281 detected tissues: blood, heart, gill, liver, stomach, intestine, muscle, brain, kidney and  
282 spleen. In Fig. 3, the liver and gill tissues had the most abundant amount of HSP90 $\beta$ 1  
283 transcript, which was obviously higher than other tissues.

284 *To-HSP90 $\beta$ 1* expression after TBT-Cl was validated by qPCR method. In Fig. 4A, its

285 *To-HSP90β1* expression patterns were all significantly up-regulated with the increase  
286 of the concentration of TBT-Cl both in liver and gill. In gill, its expression was  
287 sharply up-regulated at 10% LC<sub>50</sub>-96 h of TBT-Cl and then increased until at 50%  
288 LC<sub>50</sub>-96 h of TBT-Cl, while had a fluctuation at 20% of the concentration. However,  
289 the mRNA level in liver was relatively gentle. Broadly speaking, the expressional  
290 level in gill was higher than that in the liver. In the chronic experiment, the mRNA  
291 level rose prominently from 0 d to 20 d and down-regulated extremely at 30 d for gill  
292 sample. *To-HSP90β1* expression was smooth at recover stage in the gill. Nevertheless,  
293 its expression in liver kept a low level. In the whole processes, the 20 d-sampled  
294 group in chronic exposure stage at a lower concentration of TBT-Cl had the highest  
295 level of *To-HSP90β1* than other groups in the acute and chronic test. The entire  
296 expression pattern above showed that *To-HSP90β1* could react significantly to the  
297 effect of TBT-Cl.

### 298 **3.3. Histochemistry and immunohistochemistry**

299 In order to verify its function of *HSP90β1* after TBT-Cl exposure, the histochemistry  
300 and immunohistochemistry were performed in liver and gill. Fig. 5 (L1) showed a  
301 normal liver with even clear cells and pancreas. In L2, the tissues began to show  
302 vacuolation at the 10% LC<sub>50</sub>-96 h of TBT-Cl. With the concentration of LC<sub>50</sub>-96 h of  
303 TBT-Cl added to 20%, the tissues appeared to cellular edema and indistinct  
304 cytoplasmic borders in L3. In Fig. 5 (L4), the liver cells were necrotic under a high  
305 dosage of 50% of LC<sub>50</sub>-96 h of TBT-Cl. Moreover, the ducts in the pancreas are

306 thickened. As shown in L5, the liver had no signals while the signals of *HSP90β1* in  
307 the pictures from L6 to L8 with the rise of TBT-Cl concentration became more and  
308 more obviously. The target protein of pancreatic epithelial cells increased, and the  
309 target protein decreased in hepatocytes and hepatic sinuses with the rise of degree of  
310 exposure. However, when it came to gill, these tissues in control group had structural  
311 integrity in Fig. 5 (G1). In G2, intercellular space of the gill became small, and the gill  
312 raker was anomalous; the gill filaments were wizened and deformative in G3; some  
313 epithelial cells exfoliated and myxocytes were swollen in the gill branch leaves under  
314 a 50% of LC<sub>50</sub>-96 h TBT-Cl in G4. For IHC in gills, the control group G5 showed no  
315 signals. After the exposure to 10% of LC<sub>50</sub>-96 h of TBT-Cl, the signal of *HSP90β1*  
316 enhanced evidently in gill filaments in G6. From G7 to G8, the mRNA level increased  
317 and its signal strengthened further. Myxocytes became intumescent in 20% of  
318 LC<sub>50</sub>-96 h of TBT-Cl while the myxocytes vanished in 50% LC<sub>50</sub>-96 h of TBT-Cl  
319 exposed liver.

#### 320 **4. Discussion**

321 As a stress-sensitive molecular chaperone, HSPs played essential roles in a series of  
322 metabolism processes (Xie et al., 2015). A lot of treatments on cells activated the  
323 expression of HSP genes (Song et al., 2016). *HSP90β1*, a special actor in stress  
324 response, is an ER-enriched distributed protein which participates in associating with  
325 neonatal or abnormal proteins, assisting repair and thermo-resistance of cells (Berwin  
326 et al., 2002). Moreover, its overexpression on the cell surface was deemed to play roles  
327 in immunology relative reactions (Liu et al., 2003). In our present study, the full-length



328 cDNA sequence encoding *HSP90β1* indicated that it has two signature sequences  
329 motifs consistent with other HSP90 family proteins: a stress-induced protein motif and  
330 a terminal C-terminal domain. A special ER-target domain is also included in the  
331 sequence. This indicates likely cytosolic localization of *HSP90β1* and suggests that  
332 *HSP90β1* contains the typical conserved structural features of other eukaryotic  
333 cytoplasmic HSP90s. Moreover, the C-terminal TDKDEL characteristic of cytosolic  
334 HSP members that mediates inter-domain communication and peptide-binding  
335 capacity (Stetler et al., 2010), as well as other additional important residues involved  
336 in ATP hydrolysis, ATP binding and ATPase activity, interdomain interaction and  
337 phosphorylation by casein kinase II were also detected suggesting that both *HSP90β1*  
338 genes are functional. Obviously, this sequence included some domains and relative  
339 specific motifs, which indicates that it is conserved in evolution and involved in the  
340 relative biological process. The phylogenetic tree constructed on the basis of HSP90  
341 sequences showed that *To-HSP90β1* had the closest genetic relatives to the protein of  
342 *Takifugu rubripes*. It indicated that *To-HSP90β1* clustered in a most typical *HSP90β1*  
343 family of other species, which shows a conserved domain of functional structure in  
344 evolution. The neighbor-joining phylogenetic tree reveals a high degree of  
345 conservation in the HSP90 multigene family during evolution (Yeyati and van  
346 Heyningen, 2008). The phylogenic tree indicates an early origin for the HSP90  
347 ortholog in eukaryote evolution (Erlejman et al., 2014b).

348 In order to clarify its distributions of *To-HSP90β1* in tissues, the pattern expressions  
349 were found strongest in liver and gill, indicating that the two immune-associated  
350 tissues may involve in the main resistance to the invasion of infaust environmental  
351 factors. It might guide us to the following exploration of *To-HSP90β1* function

352 exposed to TBT-Cl.

353 To make certain the special response of this protein in the pufferfish after the invasion  
354 of TBT-Cl, the fish were exposed to different concentrations of TBT-Cl in the acute  
355 test. *To-HSP90β1* mRNA levels were significantly up-regulated at 96 h along with a  
356 rise of TBT-Cl concentrations in liver than that in gill tissue. It showed that TBT-Cl  
357 might activate the relative functional structure in *To-HSP90β1*. The increase of this  
358 protein response to the stimulation of toxic substance and it mobilized positive  
359 protective effect in homeostatic equilibrium. Interestingly, this gene in gill had a more  
360 distinct change, manifesting that the gill may be a crucial tissue for *To-HSP90β1*. In  
361 order to further study detailed functions of *To-HSP90β1* in pufferfish, chronic test and  
362 recovery experiment were enforced. Moreover, in the chronic toxicity treatment,  
363 *To-HSP90β1* showed a more serious rise during the first twenty days in gill, which  
364 indicated that this protein may take part in withstanding the impairment of TBT-Cl in  
365 the initial stage. Its sharp decline in the TBT-Cl-removed aquatic environment again  
366 displayed the effect of TBT-Cl to *To-HSP90β1*. After 30 d exposure, the pufferfish  
367 had adapted to toxicity stimulation and kept a moderate level of *HSP90β1* after a  
368 recover of damage to their bodies. *To-HSP90β1* may play essential roles in response  
369 to TBT-Cl exposure.

370 In order to verify its function to TBT-Cl exposure, the paraffin section of  
371 histochemistry and immunohistochemistry were performed. Normal liver and gill  
372 tissues of pufferfish showed moderate staining intensity for *To-HSP90β1*, while

373 TBT-Cl exposure-tissues displaying significantly strong level signals and different  
374 degrees of tissue damage and cytopathy, which showed a tendency that the toxicity of  
375 soluble TBT-Cl in water induce *To-HSP90β1* to act as a resistant. It also indicated  
376 that *To-HSP90β1* may involve in the course of immunologic balance to reply to  
377 pessimal stimulation.

378 As an ER-located chaperone, *HSP90β1*, known as glucose-regulated protein 94  
379 (GRP94 or GP96), took part in regulating cellular homeostasis and cancer biology  
380 (Heike et al., 2000b; Lammert et al., 1997; Melnick et al., 1994; Spee and Neefjes,  
381 1997). *HSP90β1* was a central regulator in the folding of the protein and monitoring  
382 the activation of transmembrane ER stress sensors. The liver defense system may be  
383 triggered by the exposure of TBT-Cl, following by a liver pathological change  
384 (hydroncus even disruptive damage) in pufferfish. This signal was then transferred to  
385 the ER. Within the cell, especially in ER, *HSP90β1* acted as a luminal chaperone for  
386 protein recognition. On one hand, HSP40s, another chaperones in the process of  
387 folding and unfolding as well as translocation and degradation of proteins, share  
388 common substrates and interaction with HSP70s through binding to the latter  
389 N-terminal ATPase domain (Clare and Saibil, 2013; Goffin and Georgopoulos, 1998;  
390 Greene et al., 1998; Hernández et al., 2002; Johnson and Craig, 2001; Szabo et al.,  
391 1996). And ATP hydrolysis requires the involvement of nucleotide exchange factors  
392 (NEFs) mediating the subsequent binding of ATP which governs substrate release  
393 from HSP70s and sets back the HSP70 chaperone cycle (Brehmer et al., 2001;  
394 Harrison et al., 1997; Liberek et al., 1991). Moreover, HSP40s are implicated in the

395 HSP90 chaperone pathway in conjunction with HSP70 thus cooperating in the folding  
396 of numerous substrate proteins in the cytosol of eukaryotes (Cintrón and Toft, 2006).  
397 On the other hand, heavy-chain binding protein (BiP, GRP78, glucose-regulated  
398 protein 78) involved in proteins misfolded bind process and lead to proteins  
399 degradation through the proteasome in a process called ER-associated degradation  
400 (ERAD). Accumulation of misfolded proteins in the ER causes a stress and activates  
401 the unfolded protein response (UPR) signaling pathway. In certain severe situations,  
402 however, the protective mechanisms activated by the UPR are not sufficient to restore  
403 normal ER function and cells die by apoptosis (Määttä et al., 2010; Naidoo, 2009;  
404 Stolz and Wolf, 2010). But, the activation of *HSP90β1* directly led to its increase of  
405 mRNA level. Then the degradation of its aim proteins and a series of cytoplasmic  
406 recombinations happened (Fig. 6). *HSP90β1* may play essential roles in this pathway.  
407 On the basis of the phenomenon we observed, an assumption was established: firstly,  
408 the exposure of TBT-Cl caused a reaction for non-specific and specific immunity,  
409 activating a series of inflammatory cytokines to resist the damage of this toxic  
410 chemical. Secondly, its toxicity of TBT-Cl induced the pressure for ER, and this  
411 energy might disequilibrate to the cellular environmental homeostasis. This  
412 disturbance in turn altered some functional molecular structures or chaperones mRNA  
413 levels, like *HSP90β1*, due to the existence of 5'-flanking region of *HSP90β1*  
414 contained ER-stress response elements (Nagahori et al., 2010). High level of TBT-Cl  
415 truly induced an increase of gp96 mRNA to react as a guard while chronic exposure  
416 triggered more dramatic rise of the mRNA level, which could conclude a relatively

417 low concentration of TBT-Cl contributing to activation for *HSP90β1* in pufferfish.  
418 Interactions of ER-dependent components in a number of signal pathways regulated  
419 the body balance of *T. obscurus*.

420 *T. obscurus*, is often saw as a module to study the aquatic species coping with harmful  
421 factors (Ai et al., 2011; Kim et al., 2010b). When facing with TBT-Cl, its physical  
422 and functional changes accompanied. HSP90s, as important members to take part in  
423 unfolding, translocating and disintegrating proteins, took an important part in  
424 protecting cells against oxidative stress (And and Lindquist, 1993). *HSP90β1* was a  
425 chaperone of HSP90 family, showed mRNA level changes under the role of TBT-Cl  
426 in *T. obscurus*. Following our study, the liver and gill were identified as vital tissues at  
427 the front lines to react to the invasion of TBT-Cl. The study we perform brought us a  
428 new outlook to regard glucose-regulated protein HSP90β1 facing with residual  
429 toxicant like TBT-Cl. It also developed our thought on high-yield fish culture and  
430 made the enlightenment to deeper study.

### 431 **Acknowledgments**

432 This work was supported by funds from the National Infrastructure of Fishery  
433 Germplasm Resources (2017DKA3047-003) and the Fund from the Provincial Key  
434 Laboratory of Conservation and Utilization of Important Biological Resources in  
435 Anhui.

436 **Author Contributions**

437 Xu Dong-po was responsible for data scoring and analyses, and writing the  
438 manuscript. Hu Hao-yuan conceived and designed the experiments. Fang Di-an, Zhao  
439 Chang-sheng and Jiang Shu-lun helped selecting the pufferfish tissues sample, RNA  
440 extraction and data analysis during manuscript preparation. All authors have read and  
441 approved the final manuscript.

442

443 **Reference**

- 444 **Ai, H., Y. Shen, C. Min, S. Pang, J. Zhang, S. Zhang, and Z. Zhao.** (2011).  
445 Molecular structure, expression and bioactivity characterization of TNF13B (BAFF)  
446 gene in mefugu, Takifugu obscurus. *Fish & Shellfish Immunology* **30**,1265-1274.
- 447 **And, D.A.P., and S. Lindquist.** (1993). The Function of Heat-Shock Proteins in  
448 Stress Tolerance: Degradation and Reactivation of Damaged Proteins. *Annual Review*  
449 *of Genetics* **27**,437.
- 450 **Antizar-Ladislao, B.** (2008). Environmental levels, toxicity and human exposure to  
451 tributyltin (TBT)-contaminated marine environment. A review. *Environment*  
452 *International* **34**,292.
- 453 **Berwin, B., M.F. Rosser, K.G. Brinker, and C.V. Nicchitta.** (2002). Transfer of  
454 GRP94(Gp96)-associated peptides onto endosomal MHC class I molecules. *Traffic*  
455 **3**,358.
- 456 **Brehmer, D., S. Rüdiger, C.S. Gässler, D. Klostermeier, L. Packschies, J.**  
457 **Reinstein, M.P. Mayer, and B. Bukau.** (2001). Tuning of chaperone activity of  
458 Hsp70 proteins by modulation of nucleotide exchange. *Nature Structural Biology*  
459 **8**,427-432.
- 460 **Cai, J.W., B.W. Henderson, J.W. Shen, and J.R. Subjeck.** (1993). Induction of  
461 glucose regulated proteins during growth of a murine tumor. *Journal of Cellular*  
462 *Physiology* **154**,229–237.
- 463 **Cheng, C.H., F.F. Yang, R.Z. Ling, S.A. Liao, Y.T. Miao, C.X. Ye, and A.L. Wang.**  
464 (2015). Effects of ammonia exposure on apoptosis, oxidative stress and immune  
465 response in pufferfish (Takifugu obscurus). *Aquatic Toxicology* **164**,61.
- 466 **Chenna, R., H. Sugawara, T. Koike, R. Lopez, T.J. Gibson, D.G. Higgins, and J.D.**  
467 **Thompson.** (2003). Multiple sequence alignment with the Clustal series of programs.  
468 *Nucleic Acids Research* **31**,3497.
- 469 **Cintron, N.S., and D. Toft.** (2006). Defining the requirements for Hsp40 and Hsp70  
470 in the Hsp90 chaperone pathway. *Journal of Biological Chemistry* **281**,26235-26244.
- 471 **Clare, D.K., and H.R. Saibil.** (2013). ATP-driven molecular chaperone machines.  
472 *Biopolymers* **99**,846-859.
- 473 **Conrad, C., and F.O. Nestle.** (2003). Dendritic cell-based cancer therapy. *Current*  
474 *Opinion in Molecular Therapeutics* **5**,405-412.
- 475 **Csermely, P., T. Schnaider, C. So" ti, Z. Prohászka, and G. Nardai.** (1998). The  
476 90-kDa Molecular Chaperone Family: Structure, Function, and Clinical Applications.  
477 A Comprehensive Review. *Pharmacology & Therapeutics* **79**,129-168.
- 478 **Dai, J., B. Liu, M.M. Caudill, H. Zheng, Y. Qiao, E.R. Podack, and Z. Li.** (2003).  
479 Cell surface expression of heat shock protein gp96 enhances cross-presentation of  
480 cellular antigens and the generation of tumor-specific T cell memory. *Cancer*  
481 *Immunity* **3**,1.
- 482 **Erlejman, A.G., M. Lagadari, J. Toneatto, G. Piwien-Pilipuk, and M.D.**  
483 **Galigniana.** (2014a). Regulatory role of the 90-kDa-heat-shock protein (Hsp90) and  
484 associated factors on gene expression. *Biochimica et biophysica acta* **1839**,71.

- 485 **Erlejman, A.G., M. Lagadari, J. Toneatto, G. Piwien-Pilipuk, and M.D.**  
486 **Galigniana.** (2014b). Regulatory role of the 90-kDa-heat-shock protein (Hsp90) and  
487 associated factors on gene expression. *Biochimica et Biophysica Acta (BBA) - Gene*  
488 *Regulatory Mechanisms* **1839**,71-87.
- 489 **Fu, D., J. Chen, Y. Zhang, and Z. Yu.** (2011). Cloning and expression of a heat  
490 shock protein (HSP) 90 gene in the haemocytes of *Crassostrea hongkongensis* under  
491 osmotic stress and bacterial challenge. *Fish & Shellfish Immunology* **31**,118-125.
- 492 **Goffin, L., and C. Georgopoulos.** (1998). Genetic and biochemical characterization  
493 of mutations affecting the carboxy-terminal domain of the *Escherichia coli* molecular  
494 chaperone DnaJ. *Molecular Microbiology* **30**,329.
- 495 **Greene, M.K., K. Maskos, and S.J. Landry.** (1998). Role of the J-Domain in the  
496 Cooperation of Hsp40 with Hsp70. *Proceedings of the National Academy of Sciences*  
497 *of the United States of America* **95**,6108-6113.
- 498 **Harrison, C.J., M. Hayer-Hartl, M.D. Liberto, and J. Kuriyan.** (1997). Crystal  
499 Structure of the Nucleotide Exchange Factor GrpE Bound to the ATPase Domain of  
500 the Molecular Chaperone DnaK. *Science* **276**,431.
- 501 **Heike, M., C. Frenzel, D. Meier, and P.R. Galle.** (2000a). Expression of stress  
502 protein gp96, a tumor rejection antigen, in human colorectal cancer. *International*  
503 *Journal of Cancer* **86**,489-493.
- 504 **Heike, M., C. Frenzel, D. Meier, and P.R. Galle.** (2000b). Expression of stress  
505 protein gp96, a tumor rejection antigen, in human colorectal cancer. *International*  
506 *Journal of Cancer Journal International Du Cancer* **86**,489.
- 507 **Hernández, M.P., A. Chadli, and D.O. Toft.** (2002). HSP40 Binding Is the First Step  
508 in the HSP90 Chaperoning Pathway for the Progesterone Receptor. *Journal of*  
509 *Biological Chemistry* **277**,11873.
- 510 **Inadera, H., and A. Shimomura.** (2005). Environmental chemical tributyltin  
511 augments adipocyte differentiation. *Toxicology Letters* **159**,226.
- 512 **Janer, G., J.C. Navarro, and C. Porte.** (2007). Exposure to TBT increases  
513 accumulation of lipids and alters fatty acid homeostasis in the ramshorn snail *Marisa*  
514 *cornuarietis*. *Comparative Biochemistry & Physiology Toxicology & Pharmacology*  
515 *Cbp* **146**,368-374.
- 516 **Jiang, J., Y. Shi, Z. Shan, L. Yang, X. Wang, and L. Shi.** (2012). Bioaccumulation,  
517 oxidative stress and HSP70 expression in *Cyprinus carpio* L. exposed to  
518 microcystin-LR under laboratory conditions. *Comparative Biochemistry & Physiology*  
519 *Part C Toxicology & Pharmacology* **155**,483-490.
- 520 **Johnson, J.L., and E.A. Craig.** (2001). An Essential Role for the Substrate-Binding  
521 Region of Hsp40s in *Saccharomyces cerevisiae*. *Journal of Cell Biology* **152**,851-856.
- 522 **Kai, W., K. Kikuchi, M. Fujita, H. Suetake, A. Fujiwara, Y. Yoshiura, M. Ototake,**  
523 **B. Venkatesh, K. Miyaki, and Y. Suzuki.** (2005). A Genetic Linkage Map for the  
524 Tiger Pufferfish, *Takifugu rubripes*. *Genetics* **171**,227.
- 525 **Kato, A., H. Doi, T. Nakada, H. Sakai, and S. Hirose.** (2005). *Takifugu obscurus* is  
526 a euryhaline fugu species very close to *Takifugu rubripes* and suitable for studying  
527 osmoregulation. *Bmc Physiol* **5**,18.
- 528 **Kelly, D.W., H.J. Macisaac, and D.D. Heath.** (2006). Vicariance and Dispersal



- 529 Effects on Phylogeographic Structure and Speciation in a Widespread Estuarine  
530 Invertebrate. *Evolution* **60**,257.
- 531 **Kim, J.H., J.S. Rhee, J.S. Lee, H.U. Dahms, J. Lee, K.N. Han, and J.S. Lee.**  
532 (2010a). Effect of cadmium exposure on expression of antioxidant gene transcripts in  
533 the river pufferfish, *Takifugu obscurus* (Tetraodontiformes). *Comparative*  
534 *Biochemistry & Physiology Toxicology & Pharmacology Cbp* **152**,473-479.
- 535 **Kim, J.H., J.S. Rhee, J.S. Lee, H.U. Dahms, J. Lee, K.N. Han, and J.S. Lee.**  
536 (2010b). Effect of cadmium exposure on expression of antioxidant gene transcripts in  
537 the river pufferfish, *Takifugu obscurus* (Tetraodontiformes). *Comparative*  
538 *Biochemistry & Physiology Part C Toxicology & Pharmacology* **152**,473-479.
- 539 **Lammert, E., D. Arnold, M. Nijenhuis, F. Momburg, G.J. Hämmerling, J.**  
540 **Brunner, S. Stevanovi, #x, H.G. Rammensee, and H.G. Schild.** (1997). The  
541 endoplasmic reticulum - resident stress protein gp96 binds peptides translocated by  
542 TAP. *European Journal of Immunology* **27**,923.
- 543 **Liberek, K., J. Marszalek, D. Ang, C. Georgopoulos, and M. Zylicz.** (1991).  
544 *Escherichia coli* DnaJ and GrpE heat shock proteins jointly stimulate ATPase activity  
545 of DnaK. *Proceedings of the National Academy of Sciences of the United States of*  
546 *America* **88**,2874-2878.
- 547 **Liu, B., J. Dai, H. Zheng, D. Stoilova, S. Sun, and Z. Li.** (2003). Cell surface  
548 expression of an endoplasmic reticulum resident heat shock protein gp96 triggers  
549 MyD88-dependent systemic autoimmune diseases. *Proceedings of the National*  
550 *Academy of Sciences of the United States of America* **100**,15824.
- 551 **Liu, Y., G.A. Hair, S.D. Boden, M. Viggswarapu, and T.P.D. Louisa.** (2002).  
552 Overexpressed LIM Mineralization Proteins Do Not Require LIM Domains to Induce  
553 Bone. *Journal of Bone & Mineral Research* **17**,406.
- 554 **Määttänen, P., K. Gehring, J.J.M. Bergeron, and D.Y. Thomas.** (2010). Protein  
555 quality control in the ER: The recognition of misfolded proteins. *Seminars in Cell &*  
556 *Developmental Biology* **21**,500-511.
- 557 **Mansour, M., and L. Ronald.** (2004). Dendritic cells: In the forefront of  
558 immunopathogenesis and vaccine development – A review. *Journal of Immune Based*  
559 *Therapies & Vaccines* **2**,1-11.
- 560 **Matthiessen, P.** (2008). An assessment of endocrine disruption in mollusks and the  
561 potential for developing internationally standardized mollusk life cycle test guidelines.  
562 *Integrated Environmental Assessment & Management* **4**,274–284.
- 563 **Mcallister, B.G., and D.E. Kime.** (2003). Early life exposure to environmental levels  
564 of the aromatase inhibitor tributyltin causes masculinisation and irreversible sperm  
565 damage in zebrafish (*Danio rerio*). *Aquatic Toxicology* **65**,309-316.
- 566 **Mcginis, S., and T.L. Madden.** (2004). BLAST: at the core of a powerful and  
567 diverse set of sequence analysis tools. *Nucleic Acids Research* **32**,20-25.
- 568 **Meador, J.P., F.C. Sommers, K.A. Cooper, and G. Yanagida.** (2011). Tributyltin  
569 and the obesogen metabolic syndrome in a salmonid. *Environmental Research*  
570 **111**,50-56.
- 571 **Melnick, J., Dul, J.L. Amp, and Y. Argon.** (1994). Sequential interaction of the  
572 chaperones BiP and GRP94 with immunoglobulin chains in the endoplasmic

- 573 reticulum. *Nature* **370**,373-375.
- 574 **Multhoff, G.** (2007). Heat shock protein 70 (Hsp70): Membrane location, export and  
575 immunological relevance. *Methods* **43**,229-237.
- 576 **Nagahori, K., S. Iwamoto, A. Maruyama, S. Suzuki, K. Hosomichi, T. Shiina, H.**  
577 **Hara, Y. Yoshida, and K. Hanzawa.** (2010). Basic characterization of 90 kDa heat  
578 shock protein genes HSP90AA1, HSP90AB1, HSP90B1 and TRAP1 expressed in  
579 Japanese quail (*Coturnix japonica*). *Animal Science Journal* **81**,513–518.
- 580 **Naidoo, N.** (2009). ER and aging—Protein folding and the ER stress response.  
581 *Ageing Research Reviews* **8**,150.
- 582 **Nakayama, K., Y. Oshima, T. Yamaguchi, Y. Tsuruda, I.J. Kang, M. Kobayashi,**  
583 **N. Imada, and T. Honjo.** (2004). Fertilization success and sexual behavior in male  
584 medaka, *Oryzias latipes*, exposed to tributyltin. *Chemosphere* **55**,1331.
- 585 **Organization, I.M.** (2001). International conference on the control of harmful  
586 anti-fouling systems for ships.
- 587 **Parsell, D.A., and S. Lindquist.** (1993). The function of heat-shock proteins in stress  
588 tolerance: degradation and reactivation of damaged proteins. *Annual Review of*  
589 *Genetics* **27**,437.
- 590 **Periannan, R., S. Balakrishnan, Z. Khashim, T. Kanagasabai, T. Loganathan,**  
591 **and S. Samuel.** (2012). Expression profiling of human presenilins. *International*  
592 *Journal of Pharma & Bio Sciences* **3**,669-678.
- 593 **Rajeshkumar, S., J. Mini, and N. Munuswamy.** (2013). Effects of heavy metals on  
594 antioxidants and expression of HSP70 in different tissues of Milk fish (*Chanos chanos*)  
595 of Kaattuppalli Island, Chennai, India. *Ecotoxicology & Environmental Safety* **98**,8.
- 596 **Ritossa, F.** (1962). A new puffing pattern induced by temperature shock and DNP in  
597 drosophila. *Experientia* **18**,571-573.
- 598 **Sørensen, J.G., T.N. Kristensen, and V. Loeschcke.** (2003). The evolutionary and  
599 ecological role of heat shock proteins. *Ecology Letters* **6**,1025–1037.
- 600 **Schmittgen, T.D., and K.J. Livak.** (2008). Analyzing real-time PCR data by the  
601 comparative CT method. *Nature Protocols* **3**,1101-1108.
- 602 **Shimasaki, Y., T. Kitano, Y. Oshima, S. Inoue, N. Imada, and T. Honjo.** (2003).  
603 Tributyltin causes masculinization in fish. *Environmental Toxicology & Chemistry*  
604 **22**,141-144.
- 605 **Smith, H.L., W. Li, and M.E. Cheetham.** (2015). Molecular chaperones and  
606 neuronal proteostasis. *Seminars in Cell & Developmental Biology* **40**,142-152.
- 607 **Song, L., C. Li, Y. Xie, S. Liu, J. Zhang, J. Yao, C. Jiang, Y. Li, and Z. Liu.** (2016).  
608 Genome-wide identification of Hsp70 genes in channel catfish and their regulated  
609 expression after bacterial infection. *Fish & Shellfish Immunology* **49**,154.
- 610 **Spee, P., and J. Neefjes.** (1997). TAP-translocated peptides specifically bind proteins  
611 in the endoplasmic reticulum, including gp96, protein disulfide isomerase and  
612 calreticulin. *European Journal of Immunology* **27**,2441-2449.
- 613 **Stetler, R.A., Y. Gan, W. Zhang, A.K. Liou, Y. Gao, G. Cao, and J. Chen.** (2010).  
614 Heat shock proteins: Cellular and molecular mechanisms in the central nervous  
615 system. *Progress in Neurobiology* **92**,184-211.
- 616 **Stolz, A., and D.H. Wolf.** (2010). Endoplasmic reticulum associated protein

- 617 degradation: A chaperone assisted journey to hell. *Biochim Biophys Acta*  
618 **1803**,694-705.
- 619 **Suto, R., and P.K. Srivastava.** (1995). A mechanism for the specific immunogenicity  
620 of heat shock protein-chaperoned peptides. *Science* **269**,1585.
- 621 **Szabo, A., R. Korszun, F.U. Hartl, and J. Flanagan.** (1996). A zinc finger - like  
622 domain of the molecular chaperone DnaJ is involved in binding to denatured protein  
623 substrates. *Embo Journal* **15**,408-417.
- 624 **Tessier, E., D. Amouroux, A. Morin, L. Christian, E. Thybaud, E. Vindimian, and**  
625 **O.F. Donard.** (2007). (Tri)butyltin biotic degradation rates and pathways in different  
626 compartments of a freshwater model ecosystem. *Science of the Total Environment*  
627 **388**,214-233.
- 628 **Thompson, J.D., T.J. Gibson, and D.G. Higgins.** (2002). Multiple sequence  
629 alignment using ClustaW and ClustalX. *Current Protocols in Bioinformatics*  
630 **Chapter 2**,Unit 2.3.
- 631 **Udono, H., and P.K. Srivastava.** (1993). Heat shock protein 70-associated peptides  
632 elicit specific cancer immunity. *Journal of Experimental Medicine* **178**,1391-1396.
- 633 **Udono, H., and P.K. Srivastava.** (1994). Comparison of tumor-specific  
634 immunogenicities of stress-induced proteins gp96, hsp90, and hsp70. *Journal of*  
635 *Immunology* **152**,5398.
- 636 **Van, d.P.Y.** (2004). Tetraodon genome confirms Takifugu findings: most fish are  
637 ancient polyploids. *Genome Biology* **5**,250.
- 638 **Xie, Y., L. Song, Z. Weng, S. Liu, and Z. Liu.** (2015). Hsp90, Hsp60 and sHsp  
639 families of heat shock protein genes in channel catfish and their expression after  
640 bacterial infections. *Fish & Shellfish Immunology* **44**,642-651.
- 641 **Xu, D., L. Sun, S. Liu, L. Zhang, and H. Yang.** (2014). Polymorphisms of heat  
642 shock protein 90 (Hsp90) in the sea cucumber *Apostichopus japonicus* and their  
643 association with heat-resistance. *Fish & Shellfish Immunology* **41**,428-436.
- 644 **Yamanoue, Y., M. Miya, K. Matsuura, S. Miyazawa, N. Tsukamoto, H. Doi, H.**  
645 **Takahashi, K. Mabuchi, M. Nishida, and H. Sakai.** (2009). Explosive speciation of  
646 Takifugu: another use of fugu as a model system for evolutionary biology. *Molecular*  
647 *Biology & Evolution* **26**,623-629.
- 648 **Yéyati, P.L., and V. van Heyningen.** (2008). Incapacitating the evolutionary  
649 capacitor: Hsp90 modulation of disease. *Current Opinion in Genetics & Development*  
650 **18**,264-272.
- 651 **Yu, G., M. Zhu, Y. Chen, Q. Pan, W. Chai, and R. Li.** (2015). Polyphasic  
652 characterization of four species of *Pseudanabaena* (Oscillatoriales, Cyanobacteria)  
653 from China and insights into polyphyletic divergence within the *Pseudanabaena* genus.  
654 *Phytotaxa* **192**,1-12.
- 655 **Zhang, J., P. Sun, T. Kong, F. Yang, and W. Guan.** (2016). Tributyltin promoted  
656 hepatic steatosis in zebrafish (*Danio rerio*) and the molecular pathogenesis involved.  
657 *Aquatic Toxicology* **170**,208-215.
- 658 **Zhang, X.-G., S. Hu, C. Han, Q.-C. Zhu, G.-J. Yan, and J.-H. Hu.** (2015).  
659 Association of heat shock protein 90 with motility of post-thawed sperm in bulls.  
660 *Cryobiology* **70**,164-169.

661

662

663

664 **Figure legends**

665 **Fig. 1.** The start codon (ATG) and stop codon (TGA) are boxed with solid lines. The  
666 Amidation site is underlined with solid lines in bold, Asn\_glycosylation sites are showed with  
667 wavy lines, the cAMP\_phospho\_site is underlined with dotted lines, the CK2\_phospho\_site is  
668 in light grey, the HSP90 domain is boxed with dotted lines and a chaperone protein htpG  
669 signature is in bold.

670 **Fig. 2.** The phylogenetic tree analysis of HSP90. The phylogenetic tree was constructed on  
671 the base of a series of *HSP90β1* proteins from different species. *T. obscurus HSP90β1* is  
672 shown in bold. The analysis is based on proteins from the above mentioned species.  
673 Phylogenetic tree constructed by the MEGA 6.0 program by the neighbor-joining (NJ)  
674 distance method. The statistical robustness of the tree was estimated by bootstrapping with  
675 1000 replicates. Bootstrap values were indicated by genetic distance. The putative protein  
676 GenBank accession number is shown in parentheses.

677 **Fig. 3.** Tissues expressions of *To-HSP90β1*. The relative *To-HSP90β1* mRNA levels derived  
678 from ten tissues for six individuals in each group were calculated by the  $2^{-\Delta\Delta Ct}$  method.  
679 Expression levels are normalized using *To-β-actin*. Vertical bar shows the mean  $\pm$  SD (n = 6).  
680 Significant differences (P < 0.05) are expressed with superscript letters (a, b, c and d,  
681 respectively, a < b < c < d).

682 **Fig. 4.** The mRNA levels of *To-HSP90β1*. (A) The pufferfish were exposed to four  
683 concentrations of TBT-Cl (0, 10%, 20% and 50% LC<sub>50</sub>-96 h). (B) The pufferfish were  
684 exposed to 900 ng/L of TBT-Cl. 30 d was designated as 0 d for recover. The samples were

685 collected in sextuplicate (n = 6). Significant differences ( $P < 0.05$ ) are presented with different  
686 superscript letters (a, b, c and d, respectively,  $a < b < c < d$ ).

687 **Fig .5.** Histochemistry (L1, L2, L3, L4, G1, G2, G3 and G4) and immunohistochemistry (L5,  
688 L6, L7, L8, G5, G6, G7 and G8) for *HSP90β1* in liver and gill.

689 L1: The control group of HE stain in liver; L2, L3 and L4: HE stained with 10%, 20%, and 50%  
690 of  $LC_{50}$ -96 h TBT-Cl exposed in liver, respectively; L5: IHC for control liver, L6, L7, and L8:  
691 IHC for 10%, 20%, and 50% of  $LC_{50}$ -96 h in TBT-Cl exposed liver, respectively. G1: The  
692 control group of HE stain in liver; G2, G3 and G4: HE stained with 10%, 20%, and 50% of  
693  $LC_{50}$ -96 h TBT-Cl exposed in liver, respectively; G5: IHC for control liver, G6, G7, and G8:  
694 IHC for 10%, 20%, and 50% of  $LC_{50}$ -96 h in TBT-Cl exposed liver, respectively. LC: liver  
695 cell; BD: bile duct; GF: gill filament; GA: gill arch; RL: branch leaf.

696 **Fig. 6.** The possible immunologic injury regulation mechanism of *To-HSP90β1* involved in  
697 TBT-Cl exposure.

698

699 Figure 1

```
1      tgggtgggagcgggtgcttgcagtcctcttggtaaggcagtcctgcctgcgctgctcc
61     cggcttttgccttaaggctccacttagacatcgttcaactgcatttcccaaa
113    [atg]aaacgttttgggtcatagccctttgctgoccttggcttgccttgcctgctgtaaaa
1      M K R V W V I G L L V A L F A F A A V K
173    gctgacgatgatgatgaaggagttgatgctgatggcaccgtagaagacgacctgggg
21     A D D D D D E G V D V D G T V E D D L G
233    aaaagcagagatggctccagaacagatgaggtgggtgcagaggaggaggagccgtc
41     K S R D G S R T D D E V V Q R E E E A V
293    cagctggactgaatgctgcccataaaggaaactccgagagaagtctgaaaaaacac
61     Q L D G L N A A Q I K E L R E K S E K H
353    gcctttcaggctgaagtcaaccgtatgatgaagctgatcatcaactcttttacaagaac
81     A F Q A E V N R M M K L I I N S L Y K M
413    aaggagatcttctcaggagctgatttccaatgctccgacgctcttgacaagatcctg
101    K E I F L R E L I S N A S D A L D K I R
473    ttgatgctctgactgatgaggacccatggcttccaacgaagagctgactatcaaaata
121    L M S L T D E D A M A S N E E L T I K I
533    aaatctgacaaggagaagaacatgctgcacatcactgatactggcattggaatgacaaa
141    K S D K E K N M L H I T D T G I G M T K
593    gaggagctggtagaagacctgggaccattgccaagtctggcaccagagatttcccaat
161    E E L V K N L G T I A K S G T S E F L N
653    aagatgacggagatgacagcggagggtcagtcaccctcggagctgattggccagttcggg
181    K M T E M Q T E G Q S T S E L I G Q F G
713    gtggcttctactccgcttctctgctgcccgaagaatcactgtagctccaacacacac
201    V G F Y S A F L V A D K V I V T S K H N
773    aacggcactcagcacatctgggagtcggactcctaaccgttctccgctcagtaggacccc
221    M G T Q H I W E S D S N Q F S V I E D P
833    cgggggacacgctgggagagaaacacacacacacacacacacacacacacacacacac
241    R G D T L G R G T T I T L V M K E E A T
893    gactatctggagctggagaccatcaagaacctggtagcaaaactccagattcattcaaac
261    D Y L E L E T I K N L V R K Y S Q F I N
953    ttccctattatgcttggcccaagactgagacttgaagagccaattgaagatgat
281    F P I Y V W A S K T E T V E E P I E D D
1013   tctgagccacagagaaccagagaagaagagccgaagatgagctgaggtaggagaggaa
301    S E A T E E P E K E A E D E A E V E E E
1073   gaggagcaaaaagaaaagcacaagacgaagaagctgagaagacgctcgggactgggaa
321    E E D K E K P K T K K V E K T V W D W E
1133   ctgatgaacacatcaaacccatctggcagcaccagcaaaaggagtgaggagagatgag
341    L M N D I K P I W Q R P A K E V E E D E
1193   tacaagctttctacaagaccttctcctaagacagcagacccctcggccacatccac
361    Y K A F Y K T F S K D S D D P L A H I H
1253   ttccacagcggaggaggttccactcaagtcacatcctgttttgcccacctcagcgccc
381    F T A E G E V T F K S I L F V P T S A P
1313   cggcgtctgtttgcaatacggctccaagaagaacgattacatcaagctgttcgtagg
401    R G L F D E Y G S K K N D Y I K L F V R
1373   agagcttctcactcactgacgacttcaatgacatgaccccaaatcctgaacttctcaaa
421    R V F I T D D F N D M M P K Y L N F V K
1433   ggagtggtcagctcagcagcttctcctgcaagctcaccagagaactctgcagcagcac
441    G V V D S D D L P L N V S R E T L Q Q C
1493   aagctcgaaggttatccgcaagaagctggtagcaaaagacttggacatgatcaagaag
461    K L L K V I R K K L V R K T L D M I K K
1553   atctgcagagagcagtagacaacgaaaagtctggaaggagtttggaaaccaatcaagctg
481    L S T E Q Y N E K F W K E F G T N I K L
1613   cggcgtctcagagcaccactccaacagaacccgtctggcacaagctcgtcgtttccagacc
501    G V I E D H S N R T R L A K L L R F Q T
1673   tcccacgcgacaccctccagccagcctggaggatgtagtggagccatgaaggagaag
521    S H S D T V Q A S L E E Y V E R M K E K
1733   caggacaagatctacttctcagcggcaccagcaggaaggagccagcttcttcccttc
541    Q D K I Y F M A G T S R K E A E S S P F
1793   gtagagagctgctgaagaagggtacagagtgatctaccctgacggagcctgtggacgag
561    V E R L L K K G Y E V I Y L T E P V D E
1853   tactgctccagccctgcccagtttcgacggaaaacgcttccagaatgctgcacaagag
581    Y C I Q A L P E F D G K R F Q N V A K E
1913   ggcgtcaaatcgcagagagcgaagaaggccaaggagaaggagaccctggagaaggac
601    G V K F D E S E K A K E K R E T L E K D
1973   tttgagcctctcaccacctggctgaaggacaagccctgaaggacaagatcagagaagcc
621    F E P L T T W L K D K A L K D K I E K A
2033   atcttgcctcagagctgaccaactcgcctcgcctcgtcgcagccagtagcggctgg
641    I L S Q R L T N S P C A L V A S Q Y G W
2093   tcaggaacatggagagatcatgaaggcacagccttaccagacgggaagagacatctct
661    S G N M E R I M K A Q A Y Q T G R D I S
2153   accaattactagccagccagaagaacgcttagaatacaaccocaaacacccctcctc
681    T N Y Y A S Q K K T L E I N P K H P L I
2213   aagcagatgctcggcaaatcaacgagatgacagagaccagacggcagaagatctggcc
701    K Q M L A K V N E D A E D Q T A E D L A
2273   atggtcctgtttgagacggcagcctgaggctggccttaccagctggccacacaaaggcc
721    M V L F E T A T L R S G Y Q L A D T K A
2333   taaggacggatcagcagcagctgctgcccctcagcagcagctgctgtagctgtagcagcag
741    Y G D R I E R M L R L S M N V A V D E Q
2393   gtggaagaagaaccagaggaggaaccagctgaggagactctgaagataaggagatgac
761    V E E E P E E E P A E E D S E D K E D D
2453   tctgaggaagaagatgaagctgttgatgaggaagatgaagaatgataaaaacagacaaa
781    S E E K D E A V D E E D E E M I K T D K
2513   gatgaact[tda]
801    D E L -
2525   agcactaaacagaagagattgtaaaccaaggacctggacatgggtctgagagtccagct
2585   ccaactgtggttctgttgtagtgggggctccctgggatgggtttttaaaggccagct
2645   tgttgttttttttttttttttttttttttttttttttttttttttttttttttttttt
2705   ttttaactcctctgttttgaagaatcctgctctcttgatcgataaatgtttcctggaaa
2765   aaaaaaaaaa
```



701 Figure 2

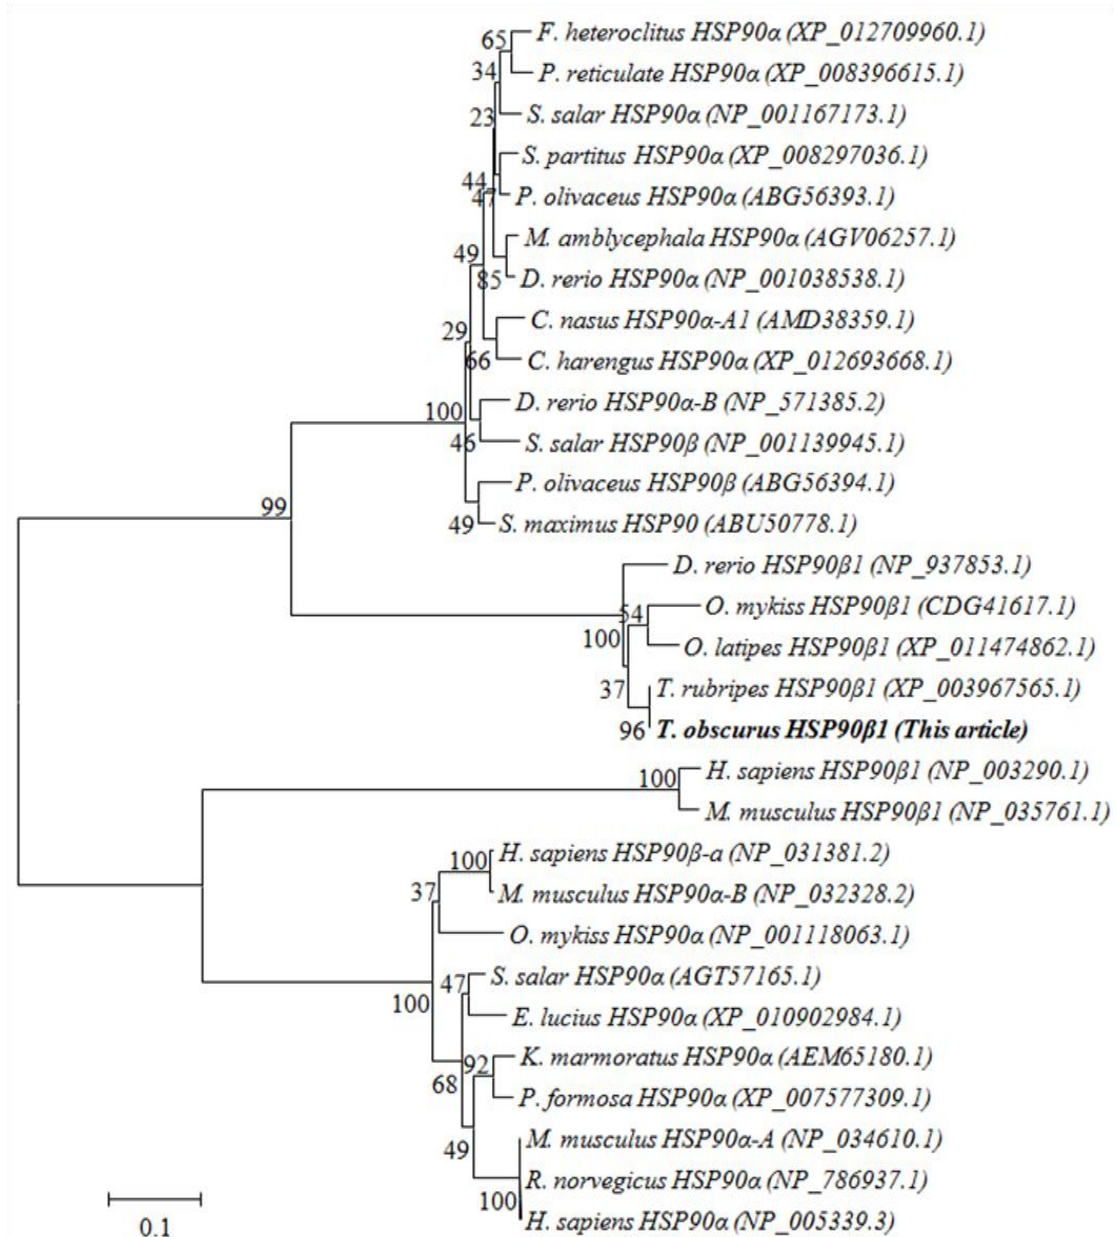

702

703



704 Figure 3

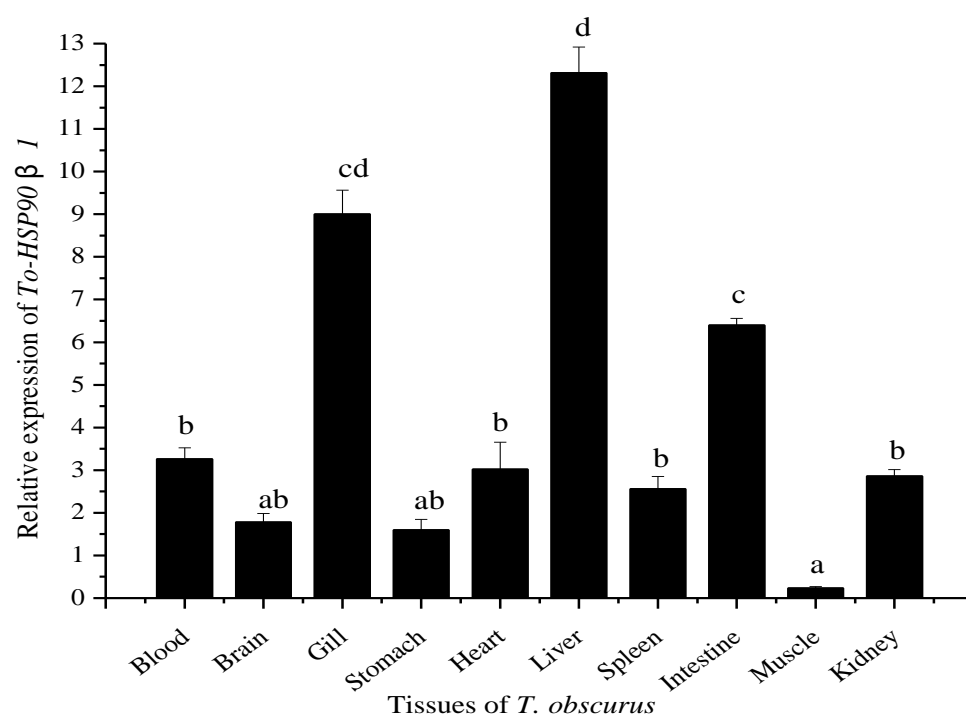

705

706

707

708 Figure 4

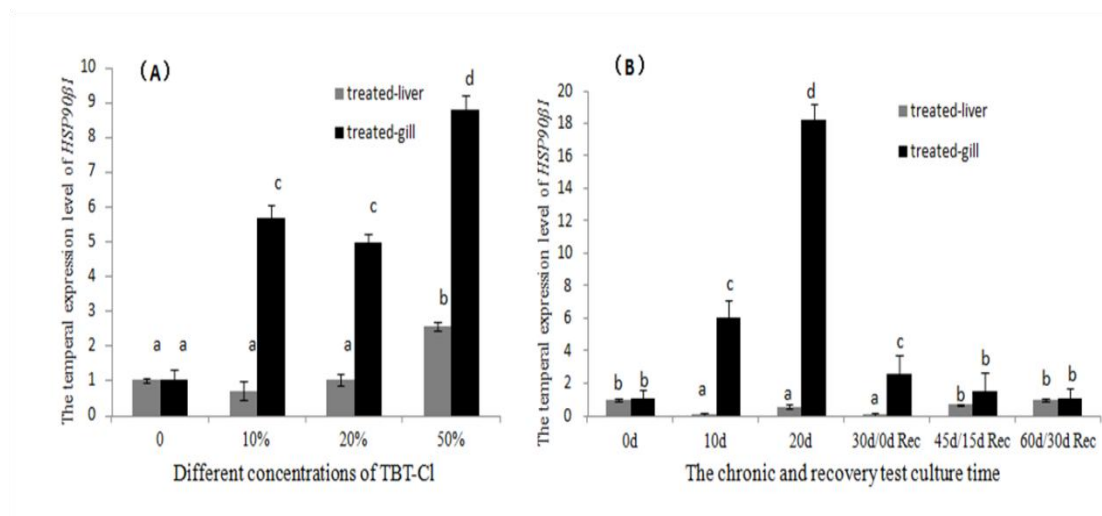

709

710

711 Figure 5

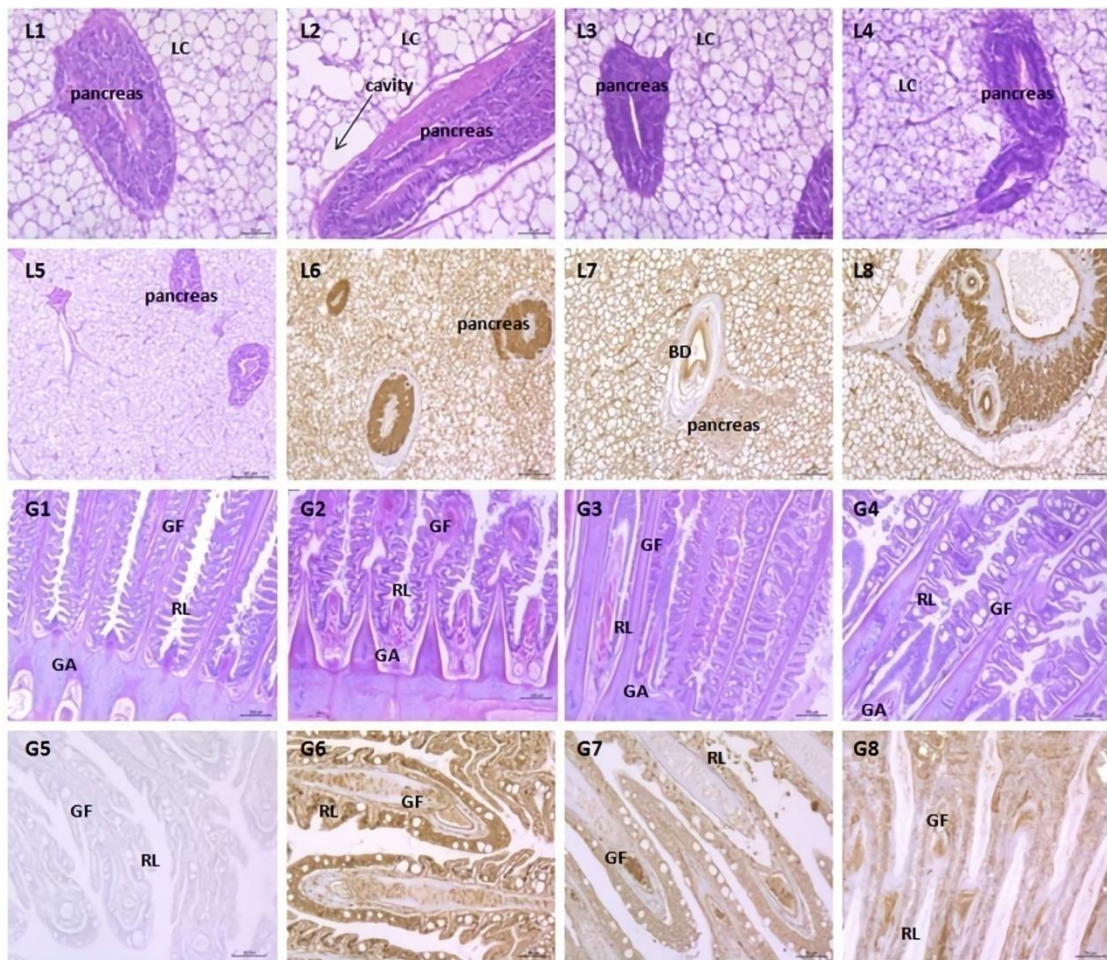

712

713

714 Figure 6

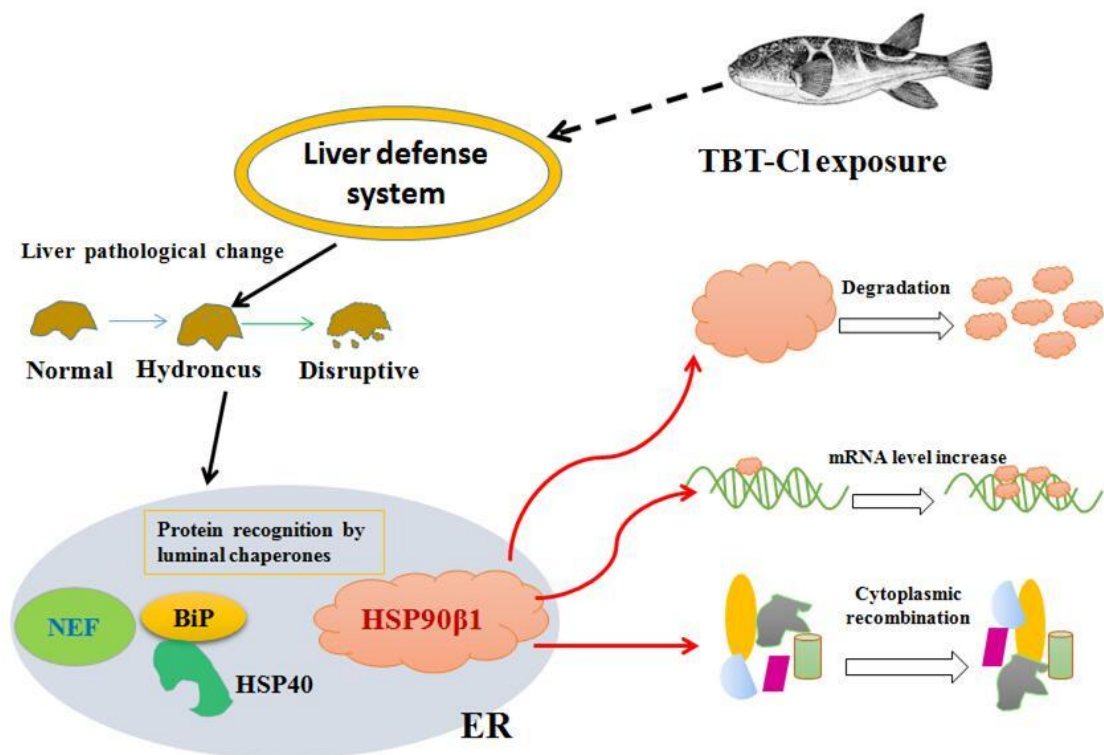

715
